# Supplementary material for: Cu3(OH)2V2O7·2H2O@rGO with bimetallic redox activity as a novel cathode material for calcium–ion batteries
Source: Royal Society of Chemistry journal article supplement (doi:10.1039/d3nj00886j), 2023-01-01
Supplement: d3nj00886j1.pdf [file d3nj00886j1.pdf]

## Supporting information

### **Cu<sub>3</sub>(OH)<sub>2</sub>V<sub>2</sub>O<sub>7</sub>·2H<sub>2</sub>O@rGO with bimetallic redox activity as a novel cathode material for calcium-ion batteries**

Xingnian Tan,<sup>a,#</sup> Junjun Wang,<sup>a,#</sup> Shuhan Jin,<sup>a</sup> Yu Wang,<sup>a</sup> Fan Qiao,<sup>a</sup> Lei Zhang,<sup>a</sup> and Qinyou An<sup>\*a,b</sup>

<sup>a</sup> State Key Laboratory of Advanced Technology for Materials Synthesis and Processing, Wuhan University of Technology, Wuhan 430070, China.

<sup>b</sup> Hubei Longzhong Laboratory, Wuhan University of Technology (Xiangyang Demonstration Zone), Xiangyang 441000, Hubei, China

# X.T. and J.W. contributed equally to this work.

#### **Experimental section**

##### **Preparation of material**

The CVO@rGO was prepared by the co-precipitation reaction. Firstly, 4 mmol of NH<sub>4</sub>VO<sub>3</sub> (0.468g) was add to 80 mL ultra-pure water and stirred 15 min in 80 °C till complete dissolution. After the solution cooled to room temperature naturally. The above yellow solution is labeled solution A. Secondly, 30 ml 0.02g ml<sup>-1</sup> graphene oxide dispersion and 6 mmol of Cu(NO<sub>3</sub>)<sub>2</sub>·2H<sub>2</sub>O (1.450g) was add to 50 mL ultra-pure water and stirred 15 min till complete dissolution. The above black solution is labeled solution B. Thirdly, solution B was string rapidly while solution A was slowly added dropwise to solution B and kept string for 5 h. Finally, the above black precipitate was centrifuged and washed with deionized water for three times and absolute ethanol for three times, respectively. The obtained black product was dried in a vacuum drying oven at

60 °C for 12 hours, which was marked as CVO@rGO. For comparison, pure CVO nanoparticles were synthesized via a similar co-precipitation method, except for the addition of graphene oxide dispersion. It is worth emphasizing that the synthesis method of CVO@rGO with simple procedure and mild reaction conditions is in accord with the idea of green chemistry.

### **Materials characterization**

In-situ XRD measurement was performed using a Bruker AXS D8 Advance powder X-ray diffractometer with an area detector using Cu K $\alpha$  X-ray source. Ex situ and powder XRD measurement was performed using a Bruker AXS D2 Advance powder X-ray diffractometer with a detector using Cu K $\alpha$  X-ray source. A field emission scanning electron microscope (FESEM) (JEOL-7100F) was utilized to observe the morphology of the prepared materials. Transmission electron microscope (TEM) images and high angular annular dark field scanning transmitted electron microscope (HAADF-STEM) images were obtained by utilizing JEM-2100F/Titan G2 60–300 transmission electron microscope. The VG Multi Lab 2000 instrument was used to collect X-ray photoelectron spectroscopic (XPS) spectra. Raman characterizations were measured with 532 nm wavelength using LABRAM HR Evolution Raman spectrometer. Thermogravimetric analysis (TGA) was carried out on a NETZSCH-STA449F5 thermo-analyzer with a heating rate of 10 °C min<sup>-1</sup> and air atmosphere.

### **Electrochemical tests**

The electrochemical performances were tested by assembling of CR2016 coin cells in an argon-filled glove box (<1 ppm of water and oxygen). Counter electrode was active carbon cloth (ACC). The separator was the Whatman glass fiber (GF/A). Aluminum foil is used as the current collector, which is stable and can avoid side reactions, such as a corrosion reaction during charge/discharge. The two Cu<sub>3</sub>(OH)<sub>2</sub>V<sub>2</sub>O<sub>7</sub>·2H<sub>2</sub>O samples (CVO, CVO@rGO)

and 2 M  $\text{Ca}(\text{TFSI})_2/\text{tetraglyme}$  (G4) were used as the working electrode and electrolyte, respectively. The working electrode was made by mixing prepared CVO or CVO@rGO samples (70 wt%), acetylene black (AB, 20 wt%) and poly(vinylidene fluoride) (PVDF, 10 wt%). They were mixed and dispersed in N-methyl-2-pyrrolidinone (NMP) to form a slurry, and the slurry was cast onto Al foil and dried at 70 °C for 24 h. The galvanostatic charge/discharge measurements were tested on LAND CT2001A battery testing system in a voltage range of -2.0~1.0 V (vs. ACC). Cyclic voltammetry was tested on Autolab PGSTAT 302 N electrochemical workstation. Electrochemical impedance spectroscopy (EIS) was tested from 0.1 Hz to 1 MHz with an amplitude of 10 mV via Autolab PGSTAT 302 N.

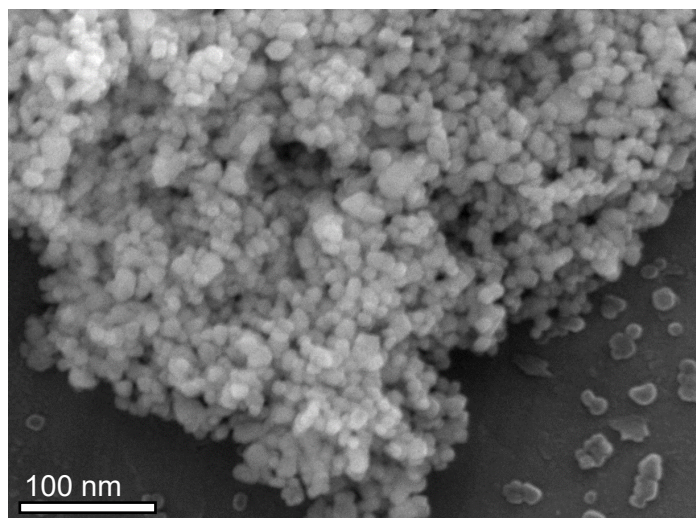

Figure S1. SEM of CVO nanoparticle.

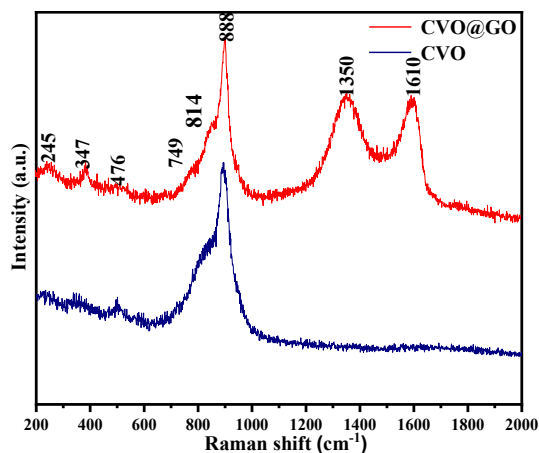

Figure S2. Raman spectra of CVO and CVO@rGO

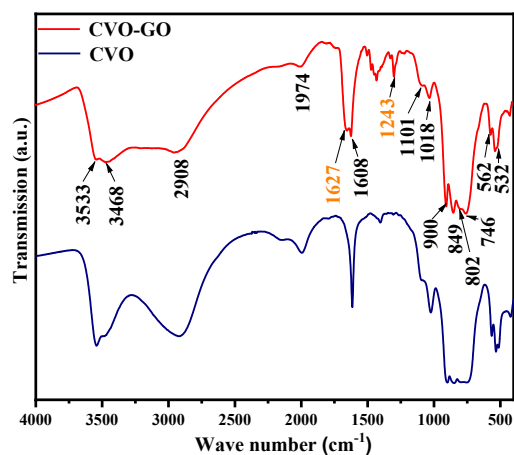

Figure S3. Fourier-transformed infrared spectrum (FT-IR) spectrum of CVO and CVO@rGO.

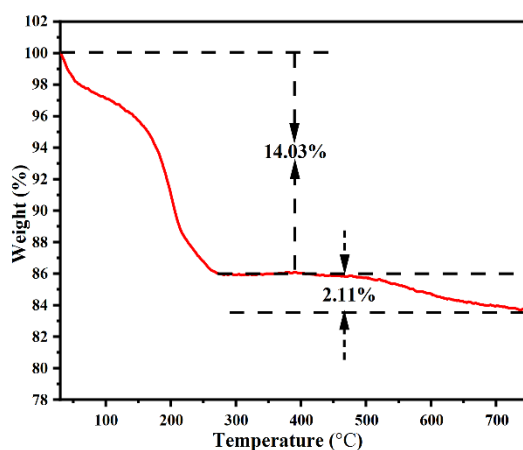

Figure S4. TGA for CVO@rGO with a heating rate of  $10\text{ }^{\circ}\text{C min}^{-1}$  and air atmosphere.

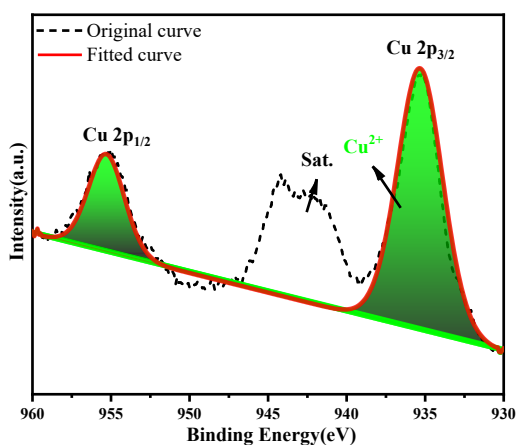

Figure S5. The XPS spectra of Cu 2p for CVO.

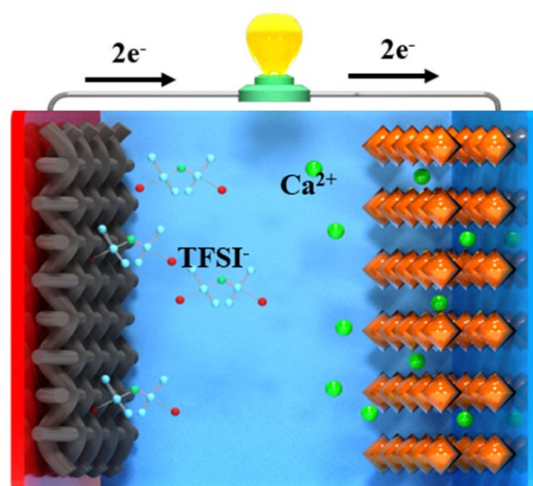

Figure S6. Configuration and working mechanism of a CVO@rGO||2 M Ca(TFSI)<sub>2</sub>/G4||activated carbon cloth (ACC) battery with an activated carbon counter electrode for the adsorption/desorption of TFSI<sup>-</sup> and CVO@rGO working electrode that can insertion/extraction Ca<sup>2+</sup>.

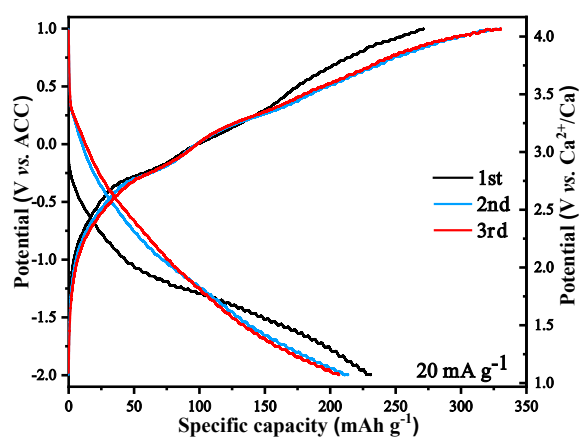

Figure S7. Galvanostatic charge/discharge profiles of CVO@rGO at first three cycles at 20 mA g<sup>-1</sup> in 0.3 M Ca(TFSI)<sub>2</sub>/G4 electrolyte

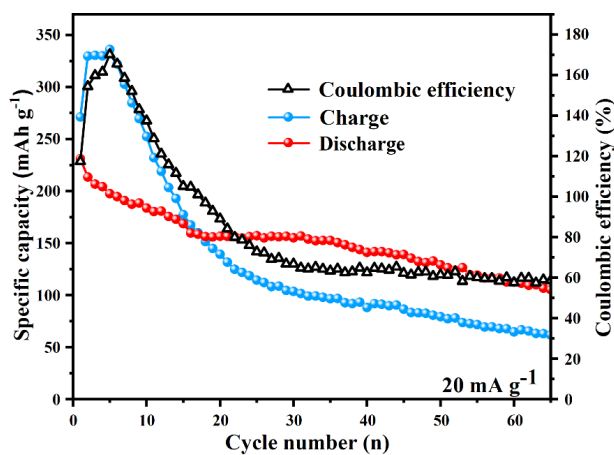

Figure S8. Cycling performances of CVO@rGO electrode at 20 mA g<sup>-1</sup> in 0.3 M Ca(TFSI)<sub>2</sub>/G4 electrolyte

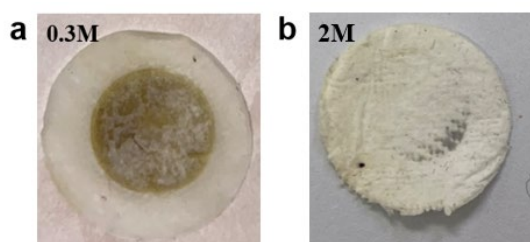

Figure S9. The photograph of separator from disassembled coin cell with (a) 0.3 M Ca(TFSI)<sub>2</sub>/G4 and (b) 2 M Ca(TFSI)<sub>2</sub>/G4 after 50 cycles.

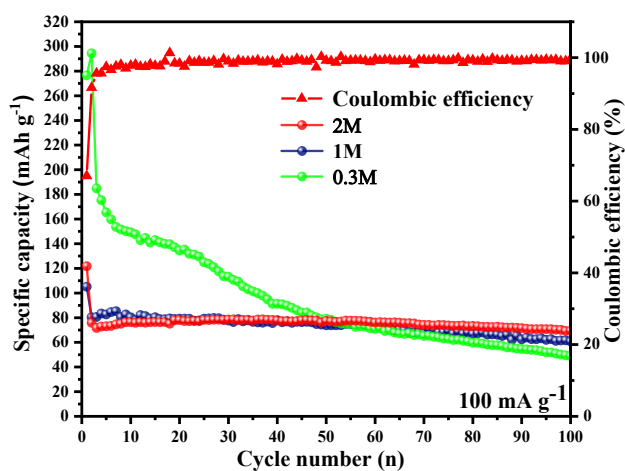

Figure S10. Cycling performances of CVO@rGO in different electrolyte concentrations at 100 mA g<sup>-1</sup>.

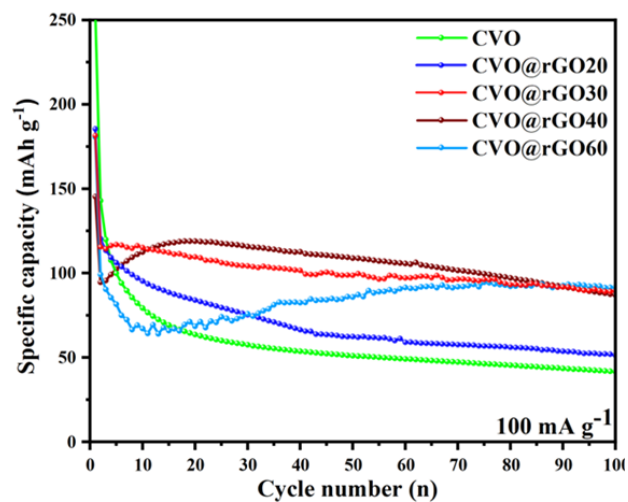

Figure S11. Cycling performances of CVO@rGO at  $100 \text{ mA g}^{-1}$  at different compound ratios.

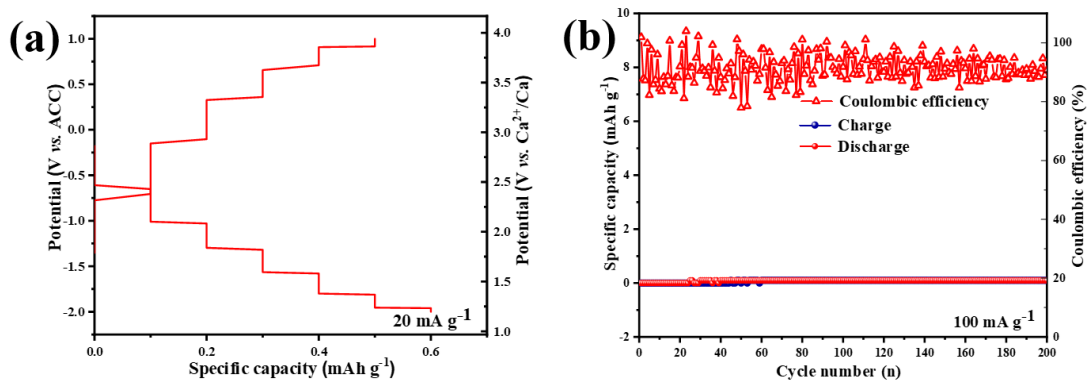

Figure S12. (a) Galvanostatic charge/discharge profiles of rGO at  $20 \text{ mA g}^{-1}$  in  $2 \text{ M Ca(TFSI)}_2/\text{G4}$  electrolyte and (b) cycling performances of at  $20 \text{ mA g}^{-1}$ .

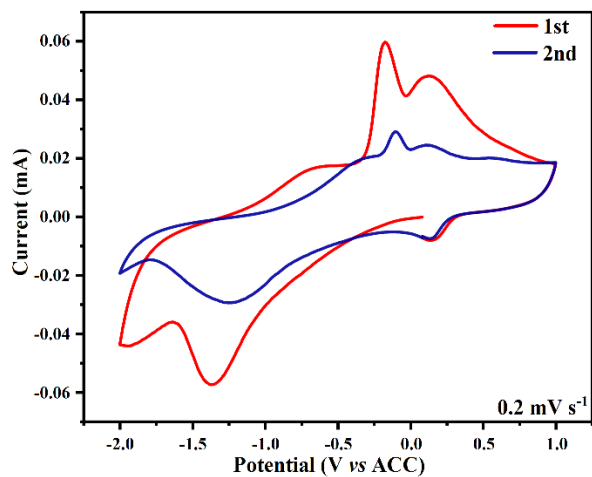

Figure S13. CV curves of CVO at a scan rate of  $0.2 \text{ mV s}^{-1}$ .

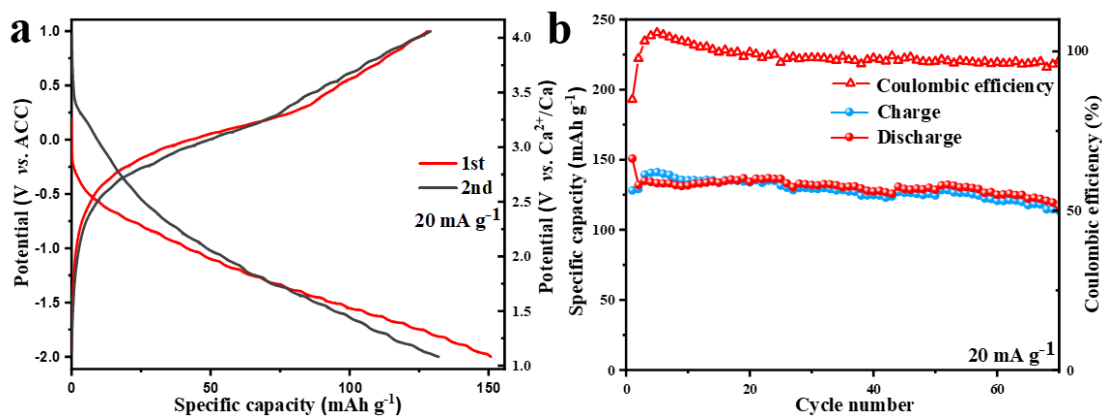

Figure S14. (a) Galvanostatic charge/discharge profiles of CVO@rGO at  $20 \text{ mA g}^{-1}$  in  $2 \text{ M Ca(TFSI)}_2/\text{G4}$  electrolyte and (b) cycling performances of at  $20 \text{ mA g}^{-1}$ .



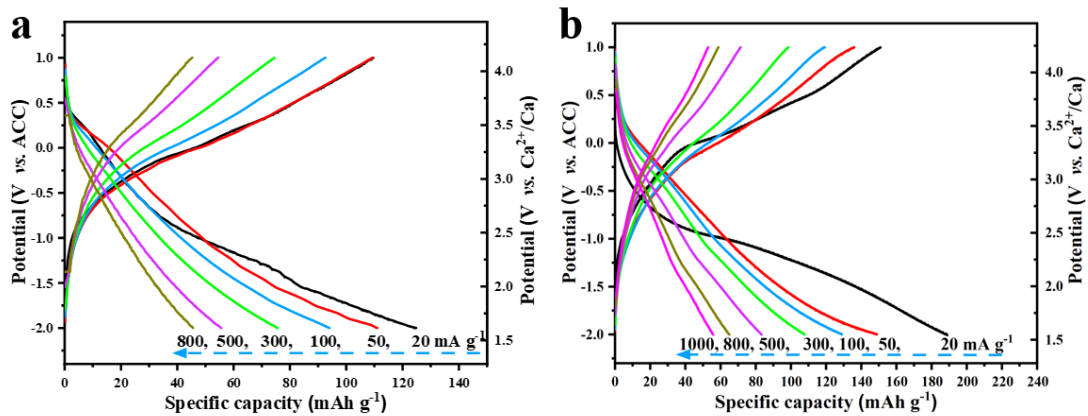

Figure S15. Charge and discharge profiles of CVO@rGO at different current densities, (a) at room temperature and (b) at 50 °C.

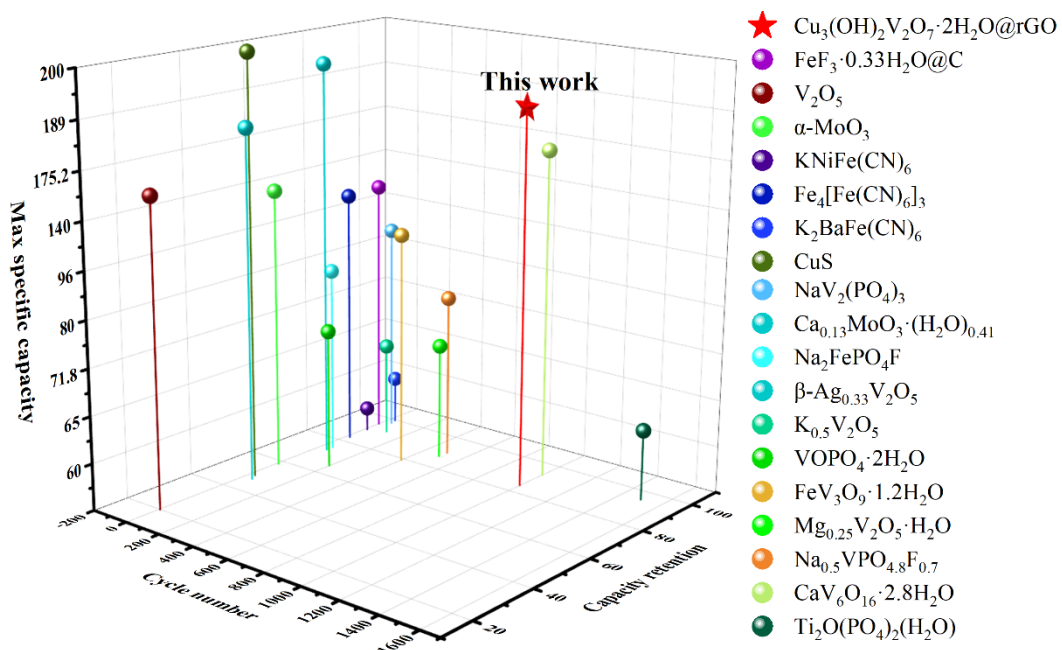

Figure S16. Performance comparison between CVO@rGO and other Cathode materials for Ca-ion batteries.

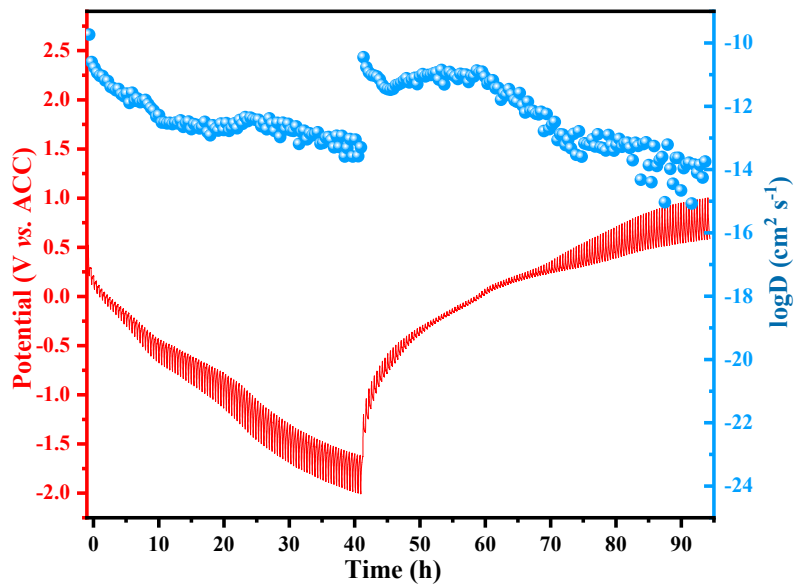

Figure S17. GITT curve of CVO electrode and diffusivity of one cycle.

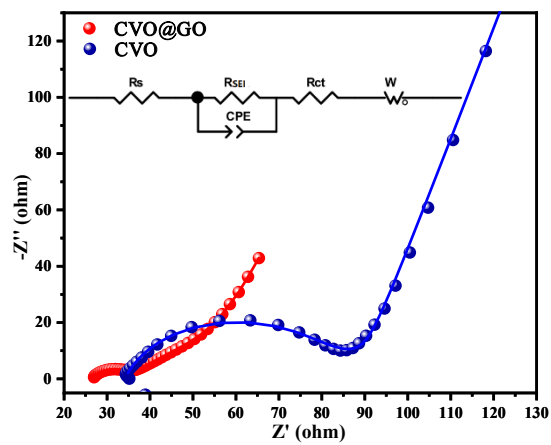

Figure S18. The Electrochemical impedance spectroscopy (EIS) results of CVO and CVO@rGO

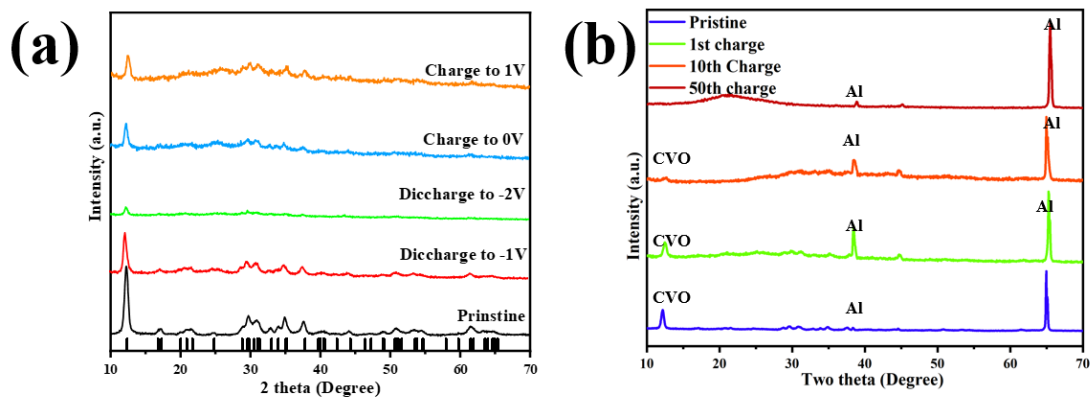

Figure S19. (a) *Ex-situ* XRD patterns for CVO@rGO at different states. (b) *Ex-situ* XRD patterns for charged CVO@rGO at different cycle

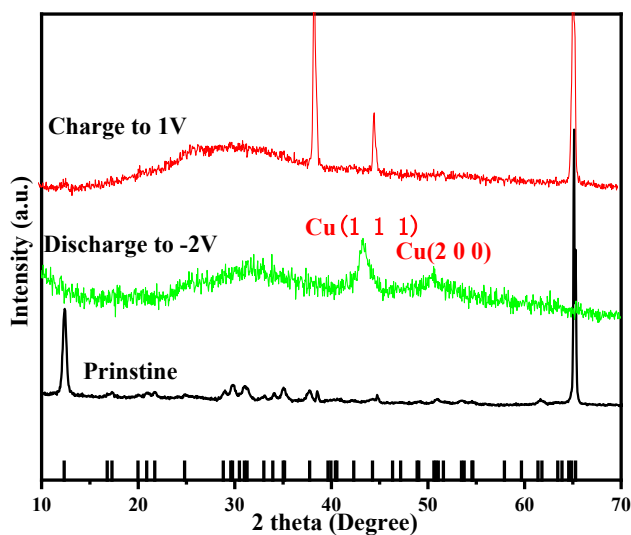

Figure S20. *Ex-situ* XRD patterns for CVO at different states.

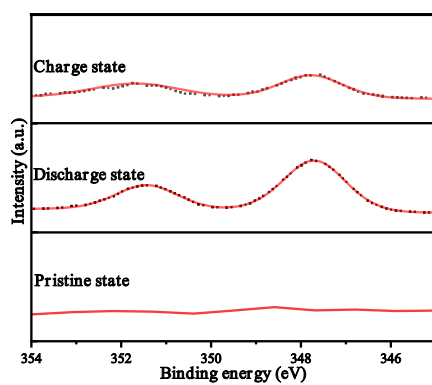

Figure S21. *Ex-situ* XPS spectra of Ca 2p at different states for CVO@rGO electrode.

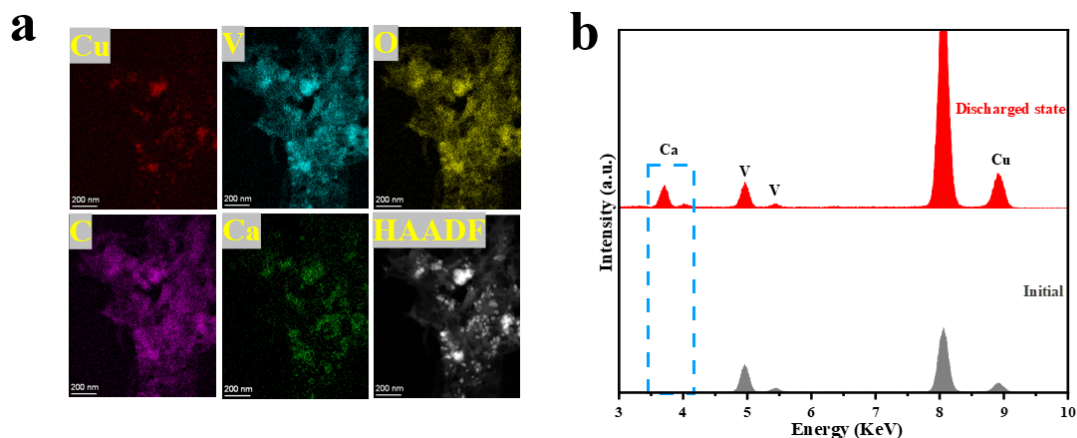

Figure S22. (a) HAADF image and corresponding elemental maps at discharged states. (b) EDX spectra of CVO@rGO at initial and discharged states.

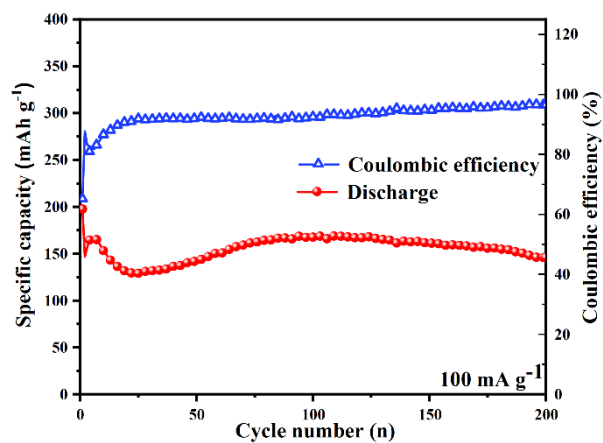

Figure S23. Cycling performances of CVO@rGO at 100 mA g<sup>-1</sup> in 0.5 M Ca(TFSI)<sub>2</sub>/AN electrolyte.

Table S1. The EIS fitted result of CVO

| Element | Freedom | Value    | Error    | Error%  |
|---------|---------|----------|----------|---------|
| Rs      | Free(?) | -3366    | 4.75E+05 | 14125   |
| Rsei    | Free(+) | 6.747    | 0.30757  | 4.5586  |
| CPE-T   | Free(?) | 6.50E-06 | 1.17E-06 | 18.003  |
| CPE-P   | Free(+) | 0.85342  | 0.019717 | 2.3104  |
| Rct     | Free(+) | 3392     | 4.75E+05 | 14017   |
| W1-R    | Free(+) | 1.045    | 2.6281   | 251.49  |
| W1-T    | Free(+) | 4.40E-06 | 2.64E-05 | 600.34  |
| W1-P    | Free(+) | 0.21948  | 0.002172 | 0.98943 |

Table S2. The EIS fitted result of CVO@rGO

| Element | Freedom | Value     | Error    | Error%   |
|---------|---------|-----------|----------|----------|
| Rs      | Free(?) | -6.35E+10 | 5.20E+06 | 0.00819  |
| Rsei    | Free(+) | 44.26     | 0.077906 | 0.17602  |
| CPE-T   | Free(?) | 4.28E-06  | 4.20E-09 | 0.098074 |
| CPE-P   | Free(+) | 0.85659   | 0.000577 | 0.067352 |
| Rct     | Free(+) | 6.35E+10  | 5.20E+06 | 0.00819  |
| W1-R    | Free(+) | 31.59     | 1.6961   | 5.3691   |
| W1-T    | Free(+) | 0.009437  | 0.000694 | 7.3489   |
| W1-P    | Free(+) | 0.42144   | 0.002721 | 0.64564  |

Table S3. The quantitative elemental ratios of CVO@rGO at initial state.

| Z  | Element | Atomic Fraction (%) | Mass Fraction (%) |
|----|---------|---------------------|-------------------|
| 6  | C       | 68.93               | 36.88             |
| 8  | O       | 11.58               | 8.53              |
| 20 | Ca      | 0                   | 0                 |
| 23 | V       | 1.03                | 2.35              |
| 29 | Cu      | 18.45               | 52.24             |

Table S4. The quantitative elemental ratios of CVO@rGO at discharged state.

| Z  | Element | Atomic Fraction (%) | Mass Fraction (%) |
|----|---------|---------------------|-------------------|
| 6  | C       | 66.16               | 35.43             |
| 8  | O       | 13.77               | 9.83              |
| 20 | Ca      | 1.26                | 2.25              |
| 23 | V       | 1.46                | 3.32              |
| 29 | Cu      | 17.35               | 49.16             |

Table S5. Performance comparison between CVO@rGO and other Cathode materials for Ca-ion batteries.

| Material                                                                               | Counter Electrode/Reference Electrode | Capacity (mAh/g)/current density (mA/g) | Number of cycles | Capacity retention | references |
|----------------------------------------------------------------------------------------|---------------------------------------|-----------------------------------------|------------------|--------------------|------------|
| Cu <sub>3</sub> (OH) <sub>2</sub> V <sub>2</sub> O <sub>7</sub> ·2H <sub>2</sub> O@rGO | ACC/-                                 | 189.9/20<br>55.4/1000                   | 1000             | 84.2               | This work  |

|                                                                      |                                                |                    |             |            |      |
|----------------------------------------------------------------------|------------------------------------------------|--------------------|-------------|------------|------|
| CaV <sub>6</sub> O <sub>16</sub> ·2.8H <sub>2</sub> O                | ACC/-                                          | 175.2/50<br>69/500 | 100<br>1000 | 74.7<br>93 | [1]  |
| Mg <sub>0.25</sub> V <sub>2</sub> O <sub>5</sub> ·H <sub>2</sub> O   | ACC/-                                          | 70.0/100           | 500         | 86.9       | [2]  |
| K <sub>2</sub> BaFe(CN) <sub>6</sub>                                 | Carbon<br>paper/Ag-<br>Ag <sup>+</sup>         | 60.0/12.5          | 30          | 96.6       | [3]  |
| Na <sub>2</sub> FePO <sub>4</sub> F                                  | BP2000<br>carbon/-                             | 80/10              | 50          | 75         | [4]  |
| α -MoO <sub>3</sub>                                                  | Activat<br>ed<br>carbon/Ca                     | 140/20             | 12          | 58         | [5]  |
| V <sub>2</sub> O <sub>5</sub>                                        | Activat<br>ed<br>carbon/Ag<br>-Ag <sup>+</sup> | 150/50             | 5           | 20         | [6]  |
| Fe <sub>4</sub> [Fe(CN) <sub>6</sub> ] <sub>3</sub>                  | Graphit<br>e rod/Ag-<br>Ag <sup>+</sup>        | 120/125            | 80          | 83         | [7]  |
| KNiFe(CN) <sub>6</sub>                                               | AC/Ag-<br>Ag <sup>+</sup>                      | 45/25              | 12          | 90         | [8]  |
| CuS                                                                  | ACC/-                                          | 200/100            | 30          | 49         | [9]  |
| FeF <sub>3</sub> ·0.33H <sub>2</sub> O@C                             | AC/Ag-<br>Ag <sup>+</sup>                      | 120/50             | 3           | 95         | [10] |
| NaV <sub>2</sub> (PO <sub>4</sub> ) <sub>3</sub>                     | AC/-                                           | 81/3.5             | 40          | 97.6       | [11] |
| Ca <sub>0.13</sub> MoO <sub>3</sub> ·(H <sub>2</sub> O) <sub>0</sub> | AC/-                                           | 192/85.65          | 50          | 72.8       | [12] |
| VOPO <sub>4</sub> ·2H <sub>2</sub> O                                 | ACC/-                                          | 71.8/100           | 200         | 65         | [13] |
| Na <sub>0.5</sub> VPO <sub>4.8</sub> F <sub>0.7</sub>                | AC/-                                           | 75/50              | 500         | 90         | [14] |
| K <sub>0.5</sub> V <sub>2</sub> O <sub>5</sub>                       | AC/-                                           | 65/66.6            | 100         | 92         | [15] |
| FeV <sub>3</sub> O <sub>9</sub> ·1.2H <sub>2</sub> O                 | AC/-                                           | 96/200             | 400         | 79         | [16] |

|                                                                     |      |          |      |    |      |
|---------------------------------------------------------------------|------|----------|------|----|------|
| $\beta$ -Ag <sub>0.33</sub> V <sub>2</sub> O <sub>5</sub>           | AC/- | 179/12.3 | 50   | 47 | [17] |
| Ti <sub>2</sub> O(PO <sub>4</sub> ) <sub>2</sub> (H <sub>2</sub> O) | AC/- | 60.8/50  | 1500 | 95 | [18] |

---

## Reference

1. Wang, J.; Wang, J.; Jiang, Y.; Xiong, F.; Tan, S.; Qiao, F.; Chen, J.; An, Q.; Mai, L. *Adv. Funct. Mater.*, 2022, 2113030.
2. X. Xu, M. Duan, Y. Yue, Q. Li, X. Zhang, L. Wu, P. Wu, B. Song and L. Mai, *ACS Energy Lett*, 2019, 4, 1328-1335.
3. Padigi, P.; Goncher, G.; Evans, D.; Solanki, R., *J. Power Sources* 2015, 273, 460-464.
4. Lipson, A. L.; Kim, S.; Pan, B.; Liao, C.; Fister, T. T.; Ingram, B. J., *J. Power Sources* 2017, 369, 133-137.
5. Cabello, M.; Nacimiento, F.; Alcántara, R.; Lavela, P.; Pérez Vicente, C.; Tirado, J. L., *Chem. Mater.* 2018, 30 (17), 5853-5861.
6. Murata, Y.; Takada, S.; Obata, T.; Tojo, T.; Inada, R.; Sakurai, *Electrochim. Acta*, 2019, 294, 210-216.
7. Kuperman, N.; Padigi, P.; Goncher, G.; Evans, D.; Thiebes, J.; Solanki, Jenny Stanford Publishing, 2017, 342, 414-418.
8. Tojo, T.; Sugiura, Y.; Inada, R.; Sakurai, Y. *J. Electrochim. Acta*, 2016, 207, 22-27.
9. Ren, W.; Xiong, F.; Fan, Y.; Xiong, Y.; Jian, Z. *J. ACS Appl. Mater. Inter-faces*, 2020, 12 (9), 10471-10478.
10. Murata, Y.; Minami, R.; Takada, S.; Aoyanagi, K.; Tojo, T.; Inada, R.; Sakurai, Y, *AIP Conf. Proc.* AIP Publishing LLC: 2017; p 020005.
11. Kim, S.; Yin, L.; Lee, M. H.; Parajuli, P.; Blanc, L.; Fister, T. T.; Park, H.; Kwon, B. J.; Ingram, B. J.; Zapol, *ACS Energy Lett*, 2020, 5 (10), 3203-3211.
12. Chae, M. S.; Kwak, H. H.; Hong, S.-T. *J. A. Adv. Energy Mater*, 2020, 3 (6), 5107-5112.
13. J. Wang, S. Tan, F. Xiong, R. Yu, P. Wu, L. Cui and Q. J. An, *Chem. Commun.*, 2020, 56, 3805-3808.
14. Xu, Z.-L.; Park, J.; Wang, J.; Moon, H.; Yoon, G.; Lim, J.; Ko, Y.-J.; Cho, S.-P.; Lee, S.-Y.; Kang, K. J. *Nat. Commun.*, 2021, 12 (1), 3369.
15. Purbarani, M. E.; Hyoung, J.; Hong, S.-T. *J. A. Adv. Energy Mater.*, 2021, 4 (8), 7487-7491.
16. Chae, M. S.; Setiawan, D.; Kim, H. J.; Hong, S. *Batteries*, 2021, 7 (3), 54.
17. Hyoung, J.; Heo, J. W.; Jeon, B.; Hong, S.-T. *J. Mater. Chem. A.*, 2021, 9 (36), 20776-20782.
18. Prabakar, S. R.; Park, W.-B.; Seo, J. Y.; Singh, S. P.; Ahn, D.; Sohn, K.-S.; Pyo, M. J. *Energy Storage Materials*, 2021, 43, 85-96.
